# Supplementary material for: Insights into the Physiology and Ecology of the Brackish-Water-Adapted Cyanobacterium Nodularia spumigena CCY9414 Based on a Genome-Transcriptome Analysis
Source: PLoS One. 2013 Mar 28;8(3):e60224. doi: 10.1371/journal.pone.0060224 (PMC3610870; doi:10.1371/journal.pone.0060224)
Supplement: Table S1 — Families of IS elements in N. spumigena CCY9414. (XLSX) [file pone.0060224.s003.xlsx]

## Sheet: Blatt1
ID	IS sequence database	E-value	IS family	IS group	comment
nsp7610	ISNsp3_aa2	5e-101	IS200/IS605	n.a.
nsp20630	ISNsp3_aa2	2e-53	IS200/IS605	n.a.
nsp20640	ISNsp2_aa2	7e-53	IS200/IS605	n.a.
nsp28990	ISNsp2_aa2	7e-53	IS200/IS605	n.a.
nsp20360	ISNsp3_aa2	5e-22	IS200/IS605	n.a.
nsp20370	ISNsp2_aa2	9e-12	IS200/IS605	n.a.
nsp5190	ISSs1_aa2	2e-96	IS1634	n.a.	possesses CDF domain [TIGR01297]; This model describes a broadly distributed family of transporters, a number of which have been shown to transport divalent cations of cobalt, cadmium and/or zinc.
nsp32650	ISSs1_aa2	2e-83	IS1634	n.a.	possesses CDF domain [TIGR01297]; This model describes a broadly distributed family of transporters, a number of which have been shown to transport divalent cations of cobalt, cadmium and/or zinc.
nsp16670	ISAva4_aa1	2e-66	IS1634	n.a.
nsp1040	ISAva4_aa1	2e-66	IS1634	n.a.
nsp31450	ISMae10_aa1	3e-65	IS1634	n.a.
nsp47100	ISMhu4_aa1	3e-58	IS1634	n.a.
nsp1060	ISAva4_aa1	2e-57	IS1634	n.a.
nsp21260	ISSs1_aa2	1e-46	IS1634	n.a.	possesses CDF domain [TIGR01297]; This model describes a broadly distributed family of transporters, a number of which have been shown to transport divalent cations of cobalt, cadmium and/or zinc.
nsp51900	ISAva4_aa1	7e-37	IS1634	n.a.
nsp47110	ISMhu4_aa1	3e-31	IS1634	n.a.
nsp21250	ISSs1_aa2	2e-29	IS1634	n.a.	possesses CDF domain [TIGR01297]; This model describes a broadly distributed family of transporters, a number of which have been shown to transport divalent cations of cobalt, cadmium and/or zinc.
nsp23700	ISAva4_aa1	1e-19	IS1634	n.a.
nsp22900	ISTosp1_aa2	0	IS200/IS605	IS1341
nsp47690	ISTosp1_aa2	0	IS200/IS605	IS1341
nsp27900	ISSoc6_aa2	4e-124	IS200/IS605	n.a.	possesses CDF domain [TIGR01297]; This model describes a broadly distributed family of transporters, a number of which have been shown to transport divalent cations of cobalt, cadmium and/or zinc.
nsp12800	ISSoc6_aa2	2e-123	IS200/IS605	n.a.	possesses CDF domain [TIGR01297]; This model describes a broadly distributed family of transporters, a number of which have been shown to transport divalent cations of cobalt, cadmium and/or zinc.
nsp45340	ISTosp1_aa2	3e-117	IS200/IS605	IS1341
nsp2590	ISTosp1_aa2	2e-113	IS200/IS605	IS1341
nsp14220	ISTosp1_aa2	5e-99	IS200/IS605	IS1341
nsp15000	ISSoc6_aa2	3e-94	IS200/IS605	n.a.	possesses CDF domain [TIGR01297]; This model describes a broadly distributed family of transporters, a number of which have been shown to transport divalent cations of cobalt, cadmium and/or zinc.
nsp24240	ISSoc3_aa2	4e-84	IS200/IS605	n.a.
nsp31740	ISMma19_aa2	3e-78	IS200/IS605	n.a.	OrfB family
nsp8700	ISBth14_aa2	1e-69	IS200/IS605	IS1341
nsp38480	ISBth14_aa2	1e-69	IS200/IS605	IS1341
nsp17630	ISSoc6_aa2	3e-68	IS200/IS605	n.a.	possesses CDF domain [TIGR01297]; This model describes a broadly distributed family of transporters, a number of which have been shown to transport divalent cations of cobalt, cadmium and/or zinc.
nsp9620	IS891_aa2	2e-57	IS200/IS605	IS1341
nsp31290	ISPa18_aa2	2e-43	IS200/IS605	IS1341
nsp3060	ISSoc6_aa2	3e-34	IS200/IS605	n.a.	possesses CDF domain [TIGR01297]; This model describes a broadly distributed family of transporters, a number of which have been shown to transport divalent cations of cobalt, cadmium and/or zinc.
nsp31280	ISMba17_aa2	4e-33	IS200/IS605	n.a.
nsp24660	ISPa18_aa2	3e-30	IS200/IS605	IS1341
nsp22660	ISEc46_aa2	1e-28	IS200/IS605	n.a.
nsp14980	ISClte2_aa1	3e-20	IS200/IS605	n.a.
nsp12810	ISClte2_aa1	3e-20	IS200/IS605	n.a.
nsp32740	ISClte2_aa1	3e-20	IS200/IS605	n.a.
nsp49740	ISClte2_aa1	3e-20	IS200/IS605	n.a.
nsp27890	ISClte2_aa1	3e-20	IS200/IS605	n.a.
nsp19310	ISSoc3_aa2	6e-19	IS200/IS605	n.a.
nsp2960	ISCysp13_aa2	9e-14	IS200/IS605	n.a.
nsp32640	ISSoc3_aa2	9e-10	IS200/IS605	n.a.
nsp19950	ISAsp3_aa1	1e-72	IS4	ISPepr1
nsp27260	ISNpu4_aa1	5e-71	IS4	IS10
nsp35170	ISAsp10_aa1	4e-42	IS4	IS10
nsp35480	ISAsp10_aa1	4e-42	IS4	IS10
nsp21480	ISAsp10_aa1	2e-41	IS4	IS10
nsp31460	ISAsp10_aa1	6e-33	IS4	IS10
nsp26690	ISAsp3_aa1	6e-33	IS4	ISPepr1
nsp22490	IS8402_aa1	5e-31	IS4	IS10
nsp21490	ISNpu4_aa1	5e-31	IS4	IS10
nsp22500	ISNpu4_aa1	5e-31	IS4	IS10
nsp46990	ISAsp10_aa1	1e-24	IS4	IS10
nsp22140	IS8402_aa1	1e-16	IS4	IS10
nsp19910	ISAsp3_aa1	8e-14	IS4	ISPepr1
nsp22480	ISAsp10_aa1	1e-08	IS4	IS10
nsp22820	ISAsp10_aa1	1e-08	IS4	IS10
nsp36370	ISAsp10_aa1	1e-08	IS4	IS10
nsp12210	IS231K_aa3	2e-08	IS4	IS231	possesses HAD_like [cd01427] domin, Haloacid dehalogenase-like hydrolases. The haloacid dehalogenase-like (HAD) superfamily includes L-2-haloacid dehalogenase, epoxide hydrolase, phosphoserine phosphatase, phosphomannomutase, phosphoglycolate phosphatase, P-type ATPase, and many others.
nsp46100	IS231K_aa3	8e-08	IS4	IS231	possesses HAD_like [cd01427] domin, Haloacid dehalogenase-like hydrolases. The haloacid dehalogenase-like (HAD) superfamily includes L-2-haloacid dehalogenase, epoxide hydrolase, phosphoserine phosphatase, phosphomannomutase, phosphoglycolate phosphatase, P-type ATPase, and many others.
nsp35490	ISNpu4_aa1	2e-07	IS4	IS10
nsp22150	ISNpu4_aa1	2e-07	IS4	IS10
nsp35190	ISNpu4_aa1	2e-07	IS4	IS10
nsp35180	ISAtsp5_aa1	4e-07	IS4	IS10
nsp19940	ISAzs36_aa1	5e-08	IS481	n.a.
nsp28860	ISMae6_aa1	7e-91	IS5	IS5	hyperamplified in Crocosphaera watsonii WH 8501
nsp28870	ISMae6_aa1	8e-52	IS5	IS5	hyperamplified in Crocosphaera watsonii WH 8501
nsp52780	ISAcma9_aa1	3e-37	IS5	IS1031
nsp28850	ISFal3B_aa1	4e-14	IS5	IS1031
nsp39470	ISMae6_aa1	1e-12	IS5	IS5	hyperamplified in Crocosphaera watsonii WH 8501
nsp49860	ISCaa6_aa1	1e-11	IS5	ISL2
nsp36430	ISCaa6_aa1	1e-11	IS5	ISL2
nsp35210	ISCaa6_aa1	1e-11	IS5	ISL2
nsp51840	ISCaa6_aa1	1e-11	IS5	ISL2
nsp15260	ISCaa6_aa1	1e-11	IS5	ISL2
nsp36620	ISCaa6_aa1	1e-11	IS5	ISL2
nsp23370	ISCaa6_aa1	1e-11	IS5	ISL2
nsp47060	ISCaa6_aa1	1e-11	IS5	ISL2
nsp20660	ISCaa6_aa1	1e-11	IS5	ISL2
nsp47050	IS1515_aa1	5e-06	IS5	ISL2
nsp51830	IS1515_aa1	5e-06	IS5	ISL2
nsp36420	IS1515_aa1	5e-06	IS5	ISL2
nsp15270	IS1515_aa1	5e-06	IS5	ISL2
nsp25900	IS1515_aa1	5e-06	IS5	ISL2
nsp36630	IS1515_aa1	6e-06	IS5	ISL2
nsp23380	IS1515_aa1	6e-06	IS5	ISL2
nsp49870	IS1515_aa1	6e-06	IS5	ISL2
nsp20350	IS1515_aa1	6e-06	IS5	ISL2
nsp20650	ISSgr2_aa1	6e-06	IS5	ISL2
nsp35200	ISSgr2_aa1	7e-06	IS5	ISL2
nsp27540	ISCARN56_aa2	1e-72	IS607	n.a.
nsp47650	ISCARN56_aa2	4e-72	IS607	n.a.
nsp33050	ISCARN56_aa2	1e-71	IS607	n.a.
nsp35370	ISCARN56_aa2	7e-63	IS607	n.a.
nsp11250	ISCARN56_aa2	7e-63	IS607	n.a.
nsp2110	ISCARN56_aa2	8e-63	IS607	n.a.
nsp50210	ISCARN56_aa2	8e-63	IS607	n.a.
nsp47640	ISAfe11_aa1	9e-63	IS607	n.a.
nsp51750	ISCARN56_aa2	1e-62	IS607	n.a.
nsp18890	ISCARN56_aa2	1e-62	IS607	n.a.
nsp33040	ISAfe11_aa1	3e-62	IS607	n.a.
nsp27550	ISAfe11_aa1	3e-62	IS607	n.a.
nsp50890	ISCfe1_aa1	3e-58	IS607	n.a.
nsp2100	ISCfe1_aa1	3e-58	IS607	n.a.
nsp16630	ISCfe1_aa1	3e-58	IS607	n.a.
nsp18880	ISCfe1_aa1	3e-58	IS607	n.a.
nsp50220	ISCfe1_aa1	3e-58	IS607	n.a.
nsp35360	ISCfe1_aa1	3e-58	IS607	n.a.
nsp580	ISCARN56_aa2	2e-52	IS607	n.a.
nsp45390	ISCARN56_aa2	8e-52	IS607	n.a.
nsp34670	ISCARN56_aa2	1e-49	IS607	n.a.
nsp32520	ISCARN56_aa2	1e-49	IS607	n.a.
nsp49850	ISAfe11_aa2	8e-48	IS607	n.a.
nsp40400	ISAfe11_aa2	2e-22	IS607	n.a.
nsp45380	IS607_aa1	2e-20	IS607	n.a.
nsp11260	IS607_aa1	2e-20	IS607	n.a.
nsp51740	IS607_aa1	2e-20	IS607	n.a.
nsp45370	IS607_aa1	2e-20	IS607	n.a.
nsp49890	ISTko1_aa1	3e-18	IS607	n.a.
nsp33740	ISTko1_aa1	3e-18	IS607	n.a.
nsp11270	ISAfe11_aa1	2e-13	IS607	n.a.
nsp50900	ISCARN56_aa2	3e-08	IS607	n.a.
nsp36560	ISAcma27_aa2	5e-54	IS630	n.a.
nsp53060	ISAcma27_aa2	7e-54	IS630	n.a.
nsp50910	ISAcma27_aa2	7e-54	IS630	n.a.
nsp36540	ISAcma27_aa2	7e-54	IS630	n.a.
nsp30380	ISAcma27_aa2	7e-54	IS630	n.a.
nsp43470	ISAcma27_aa2	7e-54	IS630	n.a.
nsp30170	ISAcma27_aa2	7e-54	IS630	n.a.
nsp53040	ISAcma27_aa2	8e-45	IS630	n.a.
nsp51910	ISAcma27_aa2	8e-45	IS630	n.a.
nsp36390	ISAcma27_aa2	1e-44	IS630	n.a.
nsp48670	ISAcma27_aa2	1e-41	IS630	n.a.
nsp47080	ISNpu3_aa1	3e-38	IS630	n.a.
nsp48650	ISAcma27_aa3	1e-37	IS630	n.a.
nsp36570	ISAcma27_aa3	2e-30	IS630	n.a.
nsp30160	ISAcma27_aa3	2e-30	IS630	n.a.
nsp30370	ISAcma27_aa3	2e-30	IS630	n.a.
nsp53050	ISAcma27_aa3	2e-30	IS630	n.a.
nsp48680	ISAcma27_aa3	2e-30	IS630	n.a.
nsp50920	ISAcma27_aa3	2e-30	IS630	n.a.
nsp43460	ISAcma27_aa3	2e-30	IS630	n.a.
nsp36140	ISAcma27_aa3	2e-30	IS630	n.a.
nsp7840	ISNpu2_aa1	1e-14	IS630	n.a.
nsp5450	ISNpu2_aa1	3e-14	IS630	n.a.
nsp35500	ISAcma25_aa2	4e-10	IS630	n.a.
nsp36550	ISAcma27_aa1	2e-09	IS630	n.a.
nsp16730	ISPlag1_aa1	4e-58	IS701	n.a.
nsp16740	ISPlag1_aa1	9e-49	IS701	n.a.
nsp21110	ISPlag1_aa1	2e-21	IS701	n.a.
nsp51890	ISAzo26_aa1	5e-08	IS91	n.a.
nsp20870	ISWz1_aa1	2e-06	IS91	n.a.
nsp50140	ISAsp1_aa1	2e-37	ISL3	n.a.
nsp32500	ISAsp1_aa1	5e-29	ISL3	n.a.
nsp7080	ISPpu12_aa1	8e-17	ISL3	n.a.
nsp28310	ISPpu12_aa1	8e-16	ISL3	n.a.
nsp50150	ISAsp1_aa1	2e-14	ISL3	n.a.
nsp48010	ISPa42_aa1	2e-90	Tn3	n.a.
nsp33450	ISSod9_aa2	3e-13	Tn3	n.a.
nsp16690	ISSod9_aa2	6e-11	Tn3	n.a.
nsp52900	ISSod9_aa2	2e-06	Tn3	n.a.
